# Supplementary material for: Identification of atmospheric transport and dispersion of Asian dust storms
Source: Copernicus journal article supplement (doi:10.5194/nhess-17-1425-2017), 2017-08-29
Supplement: Supplementary file [file nhess-17-1425-2017-supplement-title-page.pdf › nhess-17-1425-2017-supplement-title-page.pdf]

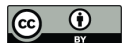

## *Supplement of*

# **Identification of atmospheric transport and dispersion of Asian dust storms**

**Raegyung Ha et al.**

*Correspondence to:* Yongjae Yu ([yongjaeyu@cnu.ac.kr](mailto:yongjaeyu@cnu.ac.kr))

- [nhess-17-1425-2017-supplement-title-page.pdf](#)
- BR
- DJ
- KS
- UR

The copyright of individual parts of the supplement might differ from the CC BY 3.0 License.
